# Supplementary material for: TGM2 inhibits the proliferation, migration and tumorigenesis of MDCK cells
Source: PubMed Central journal article supplement (PMC10146566; doi:10.1371/journal.pone.0285136), 2023-04-28
Supplement: pone.0285136.s001.pdf [file pone.0285136.s001.pdf]

**Approval of experimental Animal Ethics of Northwest Minzu University**

No.: xbm-sm-2022022

Application Date: 7 March 2022

|                                                                                                                                                                                                                                                                                                                                                                                                                                                                                                          |                                                                                       |                                                                                                                    |
|----------------------------------------------------------------------------------------------------------------------------------------------------------------------------------------------------------------------------------------------------------------------------------------------------------------------------------------------------------------------------------------------------------------------------------------------------------------------------------------------------------|---------------------------------------------------------------------------------------|--------------------------------------------------------------------------------------------------------------------|
| Name of animal Research Project: Study on TGM2 regulating the tumorigenicity of MDCK cells                                                                                                                                                                                                                                                                                                                                                                                                               |                                                                                       |                                                                                                                    |
| Project Category: The basic research                                                                                                                                                                                                                                                                                                                                                                                                                                                                     |                                                                                       |                                                                                                                    |
| Summary of animal Experiment content: Nude mice were injected subcutaneously on the back, and each was inoculated with 0.2ml cell suspension. After inoculation, nude mice were raised in SPF animal room. Observe twice a week, record the weight of nude mice, measure the tumor volume (tumor length (a) width (b)) with vernier caliper, and the tumor volume = $(a \times b^2/2)$ the weekly tumor volume growth map, final tumor volume and final body weight map of nude mice should be recorded. |                                                                                       |                                                                                                                    |
| Project Leader: Liu Zhenbin                                                                                                                                                                                                                                                                                                                                                                                                                                                                              | Tel. +86-18919144966                                                                  |                                                                                                                    |
| Project executive: Guo Shouqing                                                                                                                                                                                                                                                                                                                                                                                                                                                                          | Tel. +86-15101292196                                                                  |                                                                                                                    |
| Animal usage                                                                                                                                                                                                                                                                                                                                                                                                                                                                                             | Animal strain, breed, grade: (4-7w):<br>BALB/c nude mice                              | Average weight: 18 g                                                                                               |
|                                                                                                                                                                                                                                                                                                                                                                                                                                                                                                          | Quantity: 60                                                                          | Feeding time: 2021.8.14-2021.9.11                                                                                  |
|                                                                                                                                                                                                                                                                                                                                                                                                                                                                                                          | Anesthesia method: Inhalation anesthesia                                              | Anesthetic name: Isoflurane                                                                                        |
|                                                                                                                                                                                                                                                                                                                                                                                                                                                                                                          | Method of execution:<br>Cervical dislocation and death                                | Treatment of animal residues: Put it into a garbage bag and hand it over to the school Animal Center for treatment |
|                                                                                                                                                                                                                                                                                                                                                                                                                                                                                                          | Start date of animal experiment: August 14, 2021                                      | End Date: September 11, 2021                                                                                       |
| Declaration: I will consciously accept the supervision and inspection of the Experimental Animal Ethics Committee of Northwest Minzu University, and ensure that the above materials are objective and reliable.                                                                                                                                                                                                                                                                                         |                                                                                       |                                                                                                                    |
| Signature of the project leader: Zhenbin Liu                                                                                                                                                                                                                                                                                                                                                                                                                                                             |                                                                                       |                                                                                                                    |
| Signature (seal) of project Executor: Shouqing Guo                                                                                                                                                                                                                                                                                                                                                                                                                                                       |                                                                                       |                                                                                                                    |
| Date: 7 Mar 2022                                                                                                                                                                                                                                                                                                                                                                                                                                                                                         |                                                                                       |                                                                                                                    |
| Opinion of Collage                                                                                                                                                                                                                                                                                                                                                                                                                                                                                       |                                                                                       |                                                                                                                    |
| Chief signature: Jialin Bai                                                                                                                                                                                                                                                                                                                                                                                                                                                                              |   |                                                                                                                    |
| Seal:                                                                                                                                                                                                                                                                                                                                                                                                                                                                                                    |                                                                                       |                                                                                                                    |
| Date: 7 Mar, 2022                                                                                                                                                                                                                                                                                                                                                                                                                                                                                        |                                                                                       |                                                                                                                    |
| Opinion of ethics Committee on approval:                                                                                                                                                                                                                                                                                                                                                                                                                                                                 |                                                                                       |                                                                                                                    |
| Chief signature: Shengdong Huo                                                                                                                                                                                                                                                                                                                                                                                                                                                                           |  |                                                                                                                    |
| Seal:                                                                                                                                                                                                                                                                                                                                                                                                                                                                                                    |                                                                                       |                                                                                                                    |
| Date:                                                                                                                                                                                                                                                                                                                                                                                                                                                                                                    |                                                                                       |                                                                                                                    |
