# Supplementary material for: TGM2 inhibits the proliferation, migration and tumorigenesis of MDCK cells
Source: PubMed Central journal article supplement (PMC10146566; doi:10.1371/journal.pone.0285136), 2023-04-28

Fig 1

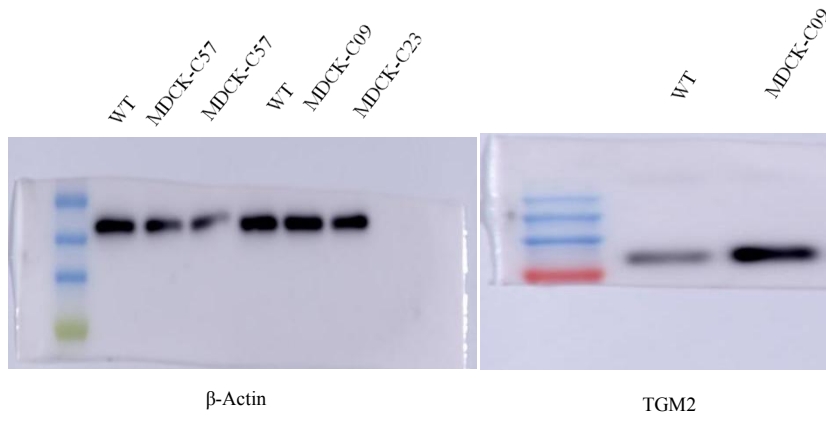

Fig2

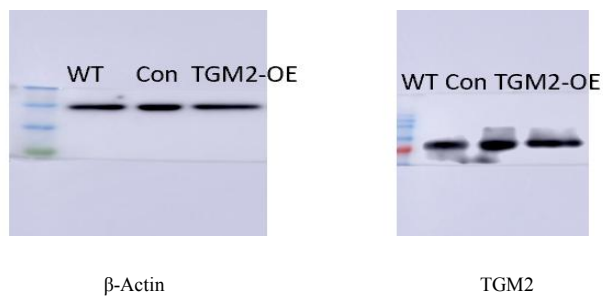

Fig3

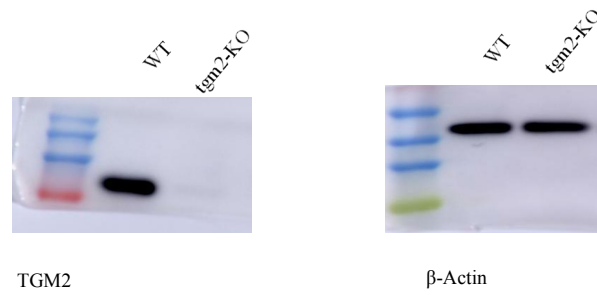

Fig4

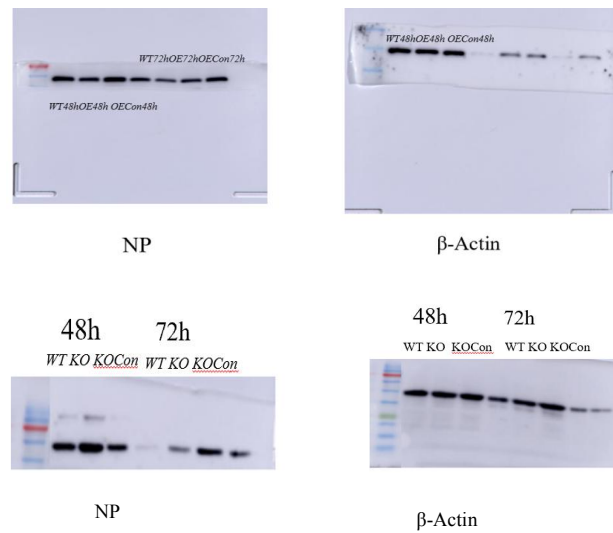

Fig6

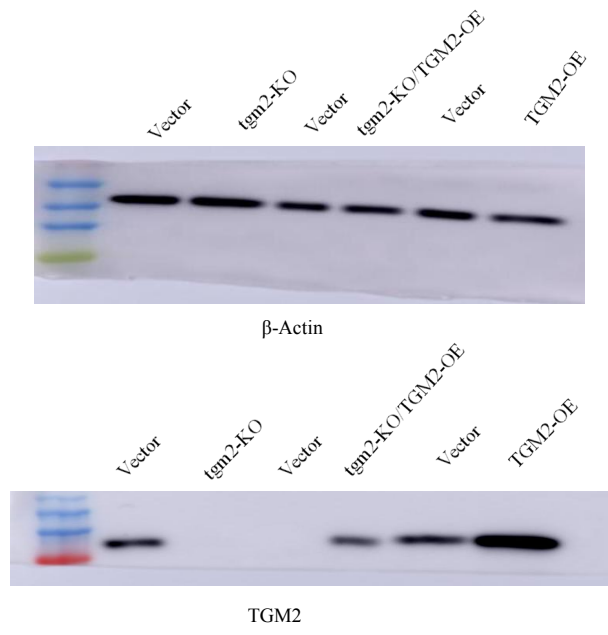

Fig7

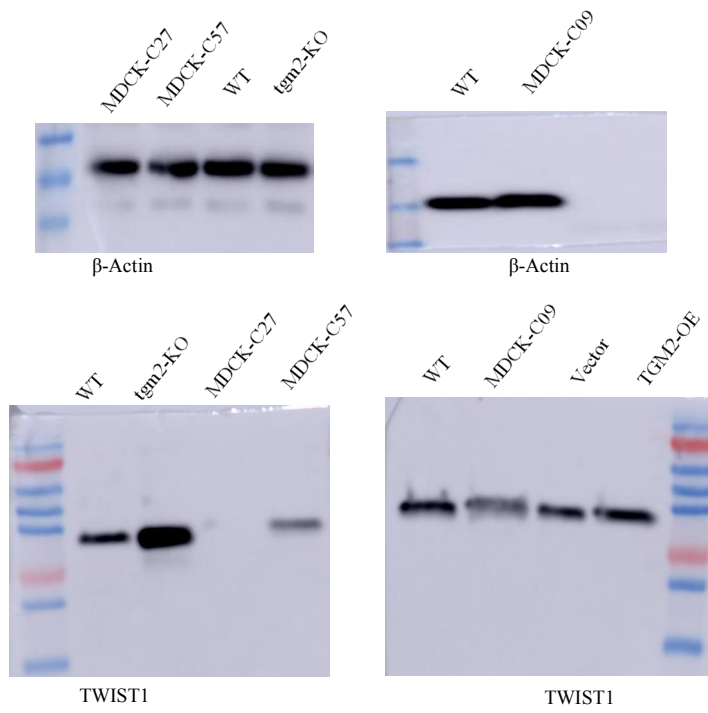

Supplement: pone.0285136.s002.pdf [file pone.0285136.s002.pdf]
