# Supplementary material for: TGM2 inhibits the proliferation, migration and tumorigenesis of MDCK cells
Source: PubMed Central journal article supplement (PMC10146566; doi:10.1371/journal.pone.0285136), 2023-04-28

Fig.S1: Detection of cell cycle by flow cytometry in TGM2 overexpressing cells and vector control cells. (A) Cell cycle of vector control cells. (B) Cell cycle of TGM2 overexpressing cells.

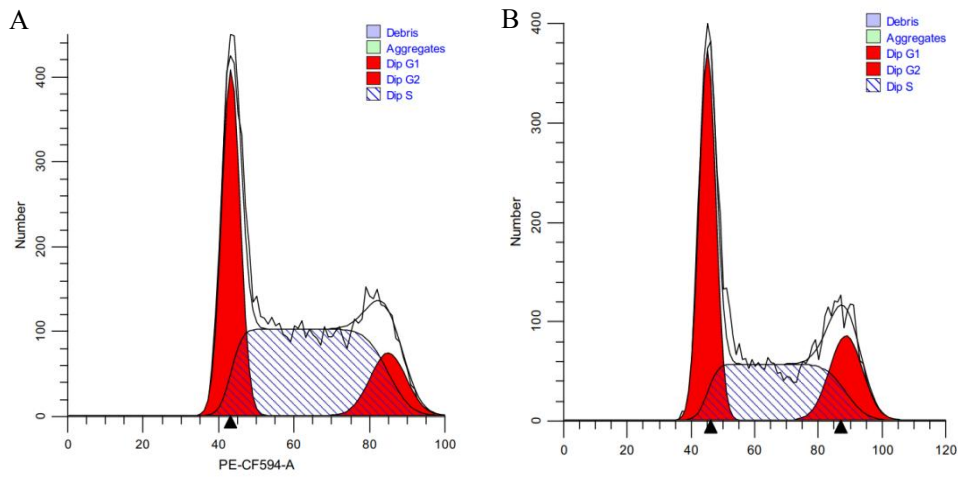

Fig.S2: Detection of cell cycle by flow cytometry in TGM2-knockout cells and Wild-type cells. (A) Cell cycle of Wild-type cells. (B) Cell cycle of TGM2-knockout cells.

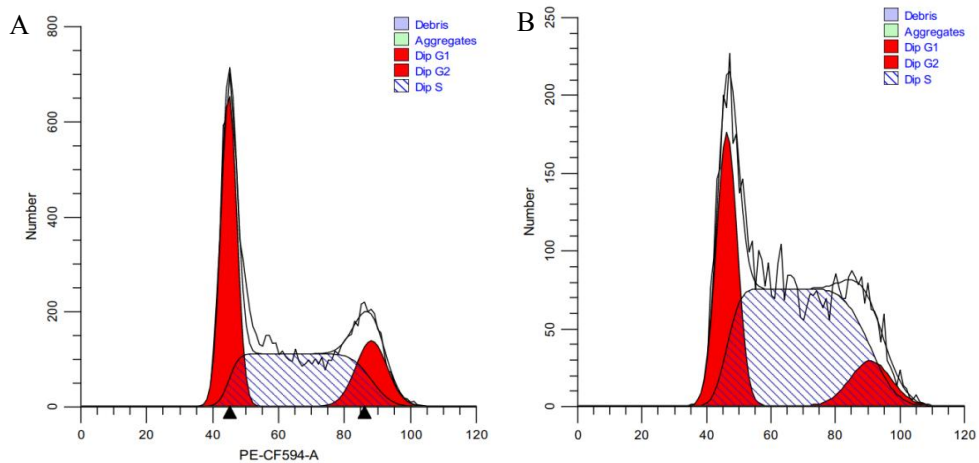

Supplement: pone.0285136.s003.pdf [file pone.0285136.s003.pdf]
